# Supplementary material for: Are “bad” jobs bad for democracy? Precarious work and electoral participation in Europe
Source: Frontiers journal article supplement (doi:10.3389/fpos.2023.1176686), 2023-06-01
Supplement: Table_1.DOCX [file Table_1.DOCX]

**Are “bad” jobs bad for democracy?**

**Precarious work and political participation in Europe**

**APPENDIX A**

| **Appendix A.** | **Logit coefficients: Probability of voting regressed on indicators of precarious work** | | | |
| --- | --- | --- | --- | --- |
|  | **with select controls (European Social Survey 2008 - 2018).** | |  |  |
|  |  |  |  |  |
| **VARIABLES** |  | (1) |  | (2) |
|  |  |  |  |  |
| **Age** |  | 0.026*** |  | 0.030*** |
|  |  | (0.003) |  | (0.004) |
| **Female** |  | 0.032 |  | -0.041 |
|  |  | (0.076) |  | (0.073) |
| **Nativity** |  | 0.994*** |  | 0.973*** |
|  |  | (0.168) |  | (0.168) |
| **Marital status (Reference = Never married)** | |  |  |  |
|  | ***Married*** | 0.396*** |  | 0.339*** |
|  |  | (0.051) |  | (0.037) |
|  | ***Separated/Divorced*** | -0.125*** |  | -0.110*** |
|  |  | (0.039) |  | (0.039) |
| **Religiosity** |  | 0.124*** |  | 0.121*** |
|  |  | (0.023) |  | (0.022) |
| **Family class (Reference = Professional)** | |  |  |  |
|  | ***Higher administration*** | -0.013 |  | -0.014 |
|  |  | (0.050) |  | (0.046) |
|  | ***Clerical*** | 0.012 |  | 0.019 |
|  |  | (0.103) |  | (0.099) |
|  | ***Sales*** | -0.154** |  | -0.112** |
|  |  | (0.060) |  | (0.056) |
|  | ***Service*** | -0.169 |  | -0.062 |
|  |  | (0.116) |  | (0.113) |
|  | ***Skilled labour*** | -0.356*** |  | -0.222*** |
|  |  | (0.095) |  | (0.084) |
|  | ***Semi-skilled labour*** | -0.442*** |  | -0.240*** |
|  |  | (0.098) |  | (0.084) |
|  | ***Unskilled labour*** | -0.569*** |  | -0.287*** |
|  |  | (0.098) |  | (0.078) |
|  | ***Farm labour*** | -0.372** |  | -0.090 |
|  |  | (0.148) |  | (0.126) |
| **Parental educational attainment** | | 0.063*** |  | -0.002 |
|  |  | (0.023) |  | (0.019) |
| **Respondent's educational attainment** | |  |  | 0.208*** |
|  |  |  |  | (0.018) |
| **Labour market position (Reference = Employed)** | |  |  |  |
|  | ***In school*** | .--- |  | 0.270*** |
|  |  |  |  | (0.061) |
|  | ***Unemployed*** | .--- |  | -0.271*** |
|  |  |  |  | (0.094) |
|  | ***Disability*** | .--- |  | -0.475*** |
|  |  |  |  | (0.098) |
|  | ***Retired*** | .--- |  | -0.047 |
|  |  |  |  | (0.073) |
|  | ***Other*** | .--- |  | -0.144*** |
|  |  |  |  | (0.041) |
| **Poverty status** |  | .--- |  | -0.196*** |
|  |  |  |  | (0.043) |
| **ESEC Class indicator (Reference = Higher manager/professionals)** | |  |  |  |
|  | ***Lower managers or professionals*** | .--- |  | -0.142*** |
|  |  |  |  | (0.052) |
|  | ***Intermediate occupations*** | .--- |  | -0.150*** |
|  |  |  |  | (0.051) |
|  | ***Small employers/Self-employed I*** | .--- |  | -0.447*** |
|  |  |  |  | (0.053) |
|  | ***Small employers/Self-employed II*** | .--- |  | -0.369*** |
|  |  |  |  | (0.085) |
|  | ***Lower supervisors and technicians*** | .--- |  | -0.452*** |
|  |  |  |  | (0.038) |
|  | ***Lower sales and service*** | .--- |  | -0.453*** |
|  |  |  |  | (0.062) |
|  | ***Lower technical*** | .--- |  | -0.551*** |
|  |  |  |  | (0.074) |
|  | ***Routine*** | .--- |  | -0.603*** |
|  |  |  |  | (0.059) |
|  |  |  |  |  |
|  |  |  |  |  |
| **Constant** |  | -0.677** |  | -0.928** |
|  |  | (0.306) |  | (0.361) |
| **Country and Year Fixed Effects** | | Yes |  | Yes |
| **Observations** |  | 132,443 |  | 132,443 |
| **Robust standard errors in parentheses** | |  |  |  |
| ***** p<0.01, ** p<0.05, * p<0.1** | |  |  |  |
|  |  |  |  |  |

*Notes:* Logistic regressions with weights and cluster-robust standard errors (countries). *Data source*: European Social Survey Multilevel (2008-2018). *** p<0.01, ** p<0.05, * p<0.1
